# Supplementary material
Source: PubMed Central journal article supplement (PMC3911224)
Supplement: AEM.02894-13_zam999105073so1.pdf [file AEM.02894-13_zam999105073so1.pdf]

Table S1. Taxonomic composition of the fungal ITS and LSU gene training set used for LOOCV comparisons of the ITS and LSU regions. Sequences were modified from Schoch *et al.* (2012) and modified as noted in the Materials & Methods section.

| Phylum     | Subphylum      | Class           | Order           | No. of Families                | No. of Genera | No. of sequences |     |
|------------|----------------|-----------------|-----------------|--------------------------------|---------------|------------------|-----|
| Ascomycota | Pezizomycotina | Dothideomycetes | Capnodiales     | 1                              | 1             | 3                |     |
|            |                |                 | Dothideales     | 2                              | 2             | 2                |     |
|            |                |                 | Myriangiales    | 1                              | 2             | 15               |     |
|            |                |                 | Pleosporales    | 3                              | 5             | 31               |     |
|            |                |                 | Chaetothyriales | 1                              | 1             | 2                |     |
|            |                |                 | Eurotiomycetes  | Eurotiales                     | 2             | 4                | 103 |
|            |                |                 |                 | Onygenales                     | 1             | 1                | 11  |
|            |                |                 |                 | Lecanorales                    | 3             | 16               | 93  |
|            |                |                 | Lecanoromycetes | Pertusariales                  | 2             | 2                | 4   |
|            |                |                 |                 | Leotiomycetes                  | 3             | 6                | 33  |
|            |                | Pezizomycetes   | Pezizales       | 2                              | 2             | 21               |     |
|            |                |                 | Coniochaetales  | 1                              | 1             | 1                |     |
|            |                |                 | Diaporthales    | 1                              | 2             | 15               |     |
|            |                |                 | Glomerellales   | 1                              | 2             | 52               |     |
|            |                |                 | Hypocreales     | 7                              | 17            | 163              |     |
|            |                |                 | Magnaporthales  | 1                              | 2             | 23               |     |
|            |                |                 | Sordariomycetes | Microascales                   | 2             | 2                | 12  |
|            |                |                 |                 | Ophiostomatales                | 1             | 2                | 28  |
|            |                |                 |                 | Sordariales                    | 2             | 2                | 26  |
|            |                |                 |                 | Sordariomycetes incertae sedis | 1             | 1                | 14  |
| Xylariales | 1              | 1               |                 | 6                              |               |                  |     |

|                                         |                                      |                                    |                    |    |     |      |
|-----------------------------------------|--------------------------------------|------------------------------------|--------------------|----|-----|------|
|                                         | Saccharomycotina                     | Saccharomycetes                    | Saccharomycetales  | 7  | 14  | 79   |
|                                         |                                      |                                    | Agaricales         | 6  | 6   | 60   |
|                                         | Agaricomycotina                      | Agaricomycetes                     | Atheliales         | 1  | 1   | 7    |
|                                         |                                      |                                    | Geastrales         | 1  | 1   | 4    |
|                                         |                                      | Tremellomycetes                    | Tremellales        | 3  | 3   | 88   |
| Basidiomycota                           | Basidiomycota incertae sedis         | Wallemiomycetes                    | Wallemiales        | 1  | 1   | 1    |
|                                         |                                      |                                    | Agaricostilbales   | 1  | 1   | 1    |
|                                         | Pucciniomycotina                     | Microbotryomycetes                 | Microbotryales     | 1  | 1   | 29   |
|                                         |                                      |                                    | Sporidiobolales    | 2  | 2   | 11   |
|                                         | Ustilaginomycotina                   | Ustilaginomycetes                  | Ustilaginales      | 1  | 1   | 6    |
| Blastocladiomycota                      | Blastocladiomycota incertae sedis    | Blastocladiomycetes                | Blastocladiales    | 1  | 2   | 19   |
| Chytridiomycota                         | Chytridiomycota incertae sedis       | Chytridiomycetes                   | Spizellomycetales  | 1  | 2   | 14   |
|                                         |                                      | Entomophthoromycotina              |                    | 1  |     |      |
|                                         | Entomophthoromycotina incertae sedis |                                    | Entomophthorales   | 1  | 1   | 3    |
|                                         | Kickxellomycotina                    | Kickxellomycotina incertae sedis   | Harpellales        | 1  | 1   | 15   |
|                                         |                                      |                                    | Kickxellales       | 1  | 3   | 7    |
| Fungi (Early diverging fungal lineages) | Mortierellomycotina                  | Mortierellomycotina incertae sedis | Mortierellales     | 1  | 2   | 26   |
|                                         | Mucoromycotina                       | Mucoromycotina incertae sedis      | Mucorales          | 8  | 13  | 50   |
|                                         | Zoopagomycotina                      | Zoopagomycotina incertae sedis     | Zoopagales         | 1  | 1   | 1    |
| Neocallimastigomycota                   | Neocallimastigomycota incertae sedis | Neocallimastigomycetes             | Neocallimastigales | 1  | 3   | 12   |
| 6                                       | 14                                   | 20                                 | 40                 | 79 | 133 | 1091 |

Table S2. BLAST and NBC comparison for ITS and LSU using the Matthews correlation coefficient. Four metrics were defined to decompose classification accuracies acquired from each taxonomic assignment classification tool (NBC and BLASTN). For a set of query read fragments, we counted the assignment combinations that could be considered consistent positives (CPs), consistent negatives (CNs), divergent positives (DPs), and divergent negatives (DNs). A set of assignment was considered a consistent positive if the query read fragment was assigned to the same and correct class by each classification tool. A consistent negative was a set of queries those were assigned to the same but incorrect class. A divergent positive denotes that at least one classification tool's assignment was correct. A divergent negative was a query read fragment was assigned to different classes by each classification tool and none of them were correctly assigned. Naïve Bayesian classifier results are above the diagonal line. BLASTN results are below the diagonal line and BLASTN vs naïve Bayesian classifier result at the diagonal. MCC denotes Matthew's correlation coefficient.

## Full length

|      | ITS1 |       |      |      |       | ITS2 |       |      |      |       | LSU  |       |      |      |       |
|------|------|-------|------|------|-------|------|-------|------|------|-------|------|-------|------|------|-------|
|      | CN   | CP    | DN   | DP   | M C C | CN   | CP    | DN   | DP   | M C C | CN   | CP    | DN   | DP   | M C C |
| ITS1 | 3.3% | 87.2% | 4.3% | 5.3% | 36%   | 3.2% | 89.4% | 2.0% | 5.5% | 44%   | 2.3% | 88.6% | 0.8% | 8.4% | 37%   |
| ITS2 | 3.4% | 86.7% | 1.5% | 8.4% | 40%   | 2.8% | 90.3% | 1.1% | 5.8% | 46%   | 2.8% | 91.3% | 0.6% | 5.4% | 51%   |
| LSU  | 2.9% | 86.5% | 1.2% | 9.5% | 37%   | 4.2% | 91.7% | 0.8% | 3.5% | 66%   | 2.7% | 91.2% | 0.3% | 6.0% | 51%   |

## 50-200bp length

|      | ITS1 |       |      |      |       | ITS2 |       |      |      |       | LSU  |       |      |      |       |
|------|------|-------|------|------|-------|------|-------|------|------|-------|------|-------|------|------|-------|
|      | CN   | CP    | DN   | DP   | MCC   | CN   | CP    | DN   | DP   | MCC   | CN   | CP    | DN   | DP   | MCC   |
| ITS1 | 3.2% | 89.2% | 1.8% | 5.8% | 44.3% | 3.4% | 88.2% | 1.8% | 6.6% | 43.5% | 2.3% | 86.3% | 1.7% | 9.7% | 28.4% |
| ITS2 | 2.8% | 90.1% | 1.1% | 6.0% | 44.2% | 3.5% | 89.2% | 0.6% | 6.7% | 51.5% | 3.8% | 88.5% | 0.9% | 6.7% | 50.5% |
| LSU  | 2.2% | 89.6% | 1.5% | 6.7% | 34.4% | 4.3% | 91.0% | 1.3% | 3.4% | 62.7% | 2.8% | 87.9% | 1.0% | 8.2% | 40.0% |

## 100-200bp length

|      | ITS1 |       |      |      |       | ITS2 |       |      |      |       | LSU  |       |      |      |       |
|------|------|-------|------|------|-------|------|-------|------|------|-------|------|-------|------|------|-------|
|      | CN   | CP    | DN   | DP   | MCC   | CN   | CP    | DN   | DP   | MCC   | CN   | CP    | DN   | DP   | MCC   |
| ITS1 | 2.7% | 87.1% | 1.2% | 9.0% | 36.2% | 3.6% | 88.0% | 1.7% | 6.6% | 45.2% | 2.4% | 86.4% | 1.7% | 9.5% | 29.6% |
| ITS2 | 2.8% | 89.9% | 1.3% | 6.0% | 43.1% | 3.6% | 88.9% | 0.7% | 6.8% | 51.4% | 3.8% | 88.2% | 0.9% | 7.1% | 50.3% |
| LSU  | 2.2% | 89.5% | 1.6% | 6.6% | 34.3% | 4.3% | 90.9% | 1.4% | 3.4% | 62.5% | 2.9% | 87.8% | 0.9% | 8.4% | 40.8% |

## 150-200bp length

|      | ITS1 |       |      |      |       | ITS2 |       |      |      |       | LSU  |       |      |      |       |
|------|------|-------|------|------|-------|------|-------|------|------|-------|------|-------|------|------|-------|
|      | CN   | CP    | DN   | DP   | MCC   | CN   | CP    | DN   | DP   | MCC   | CN   | CP    | DN   | DP   | MCC   |
| ITS1 | 3.5% | 89.3% | 1.5% | 5.6% | 48.4% | 4.1% | 88.8% | 1.3% | 5.8% | 52.4% | 2.9% | 86.7% | 1.3% | 9.1% | 36.3% |
| ITS2 | 3.1% | 89.0% | 1.4% | 6.5% | 43.4% | 3.8% | 88.0% | 0.5% | 7.6% | 51.3% | 4.3% | 87.8% | 0.7% | 7.3% | 53.6% |
| LSU  | 2.7% | 88.5% | 1.5% | 7.3% | 38.2% | 5.5% | 89.8% | 1.1% | 3.6% | 68.5% | 3.5% | 86.8% | 0.9% | 8.8% | 44.2% |

Table S3. Comparison of ITS1, ITS2 and entire ITS classification accuracy using the ITS-LSU (barcode) and large ITS training sets

|        | ITS1    |       |         |       | ITS2    |       |         |       | Entire ITS |       |         |       |
|--------|---------|-------|---------|-------|---------|-------|---------|-------|------------|-------|---------|-------|
|        | NBC     |       | BLASTN  |       | NBC     |       | BLASTN  |       | NBC        |       | BLASTN  |       |
|        | Barcode | Large | Barcode | Large | Barcode | Large | Barcode | Large | Barcode    | Large | Barcode | Large |
| Phylum | 97.8%   | 99.1% | 93.0%   | 98.3% | 99.3%   | 99.4% | 99.2%   | 99.3% | 99.5%      | 99.5% | 99.6%   | 99.4% |
| Class  | 97.1%   | 97.3% | 93.0%   | 97.2% | 98.5%   | 98.2% | 98.6%   | 97.9% | 98.7%      | 98.2% | 99.0%   | 98.2% |
| Order  | 96.5%   | 94.2% | 93.0%   | 94.9% | 98.3%   | 95.4% | 98.6%   | 95.7% | 98.4%      | 95.8% | 99.1%   | 95.9% |
| Family | 95.5%   | 90.3% | 92.6%   | 91.7% | 97.7%   | 91.4% | 98.1%   | 92.4% | 97.7%      | 92.2% | 98.4%   | 93.0% |
| Genus  | 90.8%   | 80.2% | 88.7%   | 84.2% | 93.2%   | 81.7% | 93.1%   | 84.6% | 93.9%      | 83.1% | 94.8%   | 85.5% |

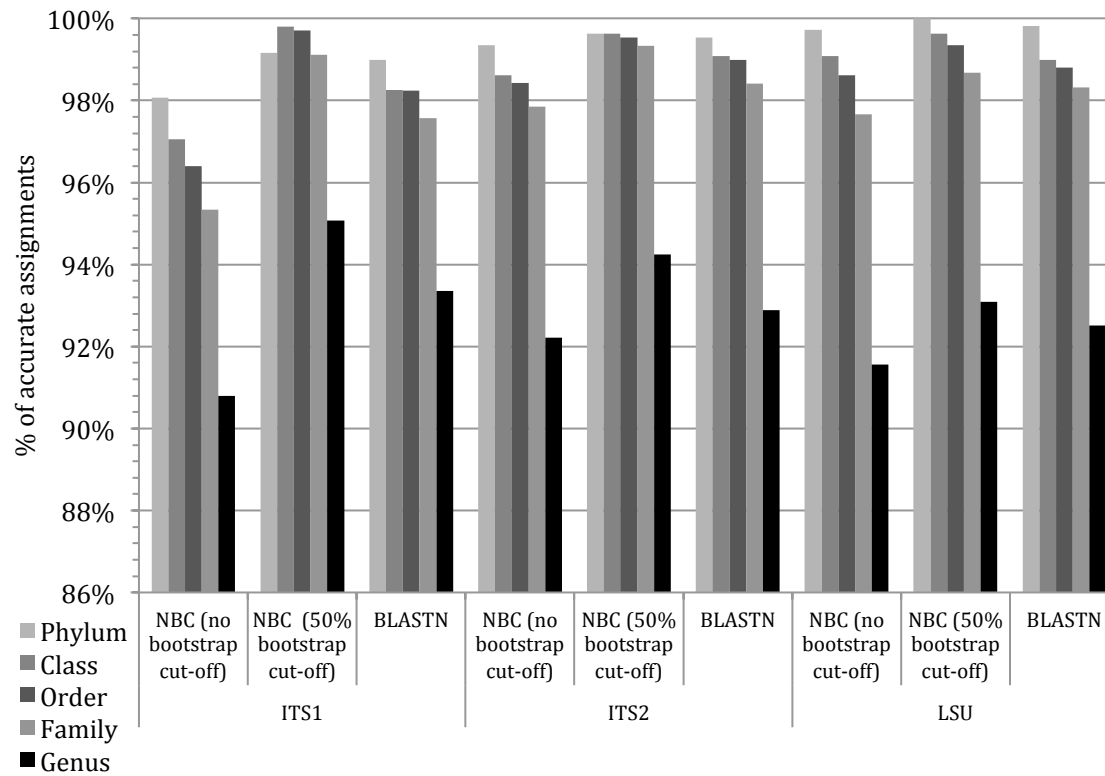

Figure S1. Accuracy comparison among ITS1, ITS2 and LSU regions using the naïve Bayesian classifier and BLASTN at its default setting and 50% bootstrap cutoff. Y axis shows percentages of LOOCV sequences accurately classified. Sequence length shown here is between 50 and 200bp (1054 non-singleton sequences out of 1089 sequences longer than 50bp). Fragments were extracted using the primer anchored method.
